# Supplementary material for: Metal organic framework/chitosan/polyethylene oxide composite columnar foam as a sorbent for the enrichment and determination of estrogens in environmental aqueous solutions
Source: Royal Society of Chemistry journal article supplement (doi:10.1039/d1nj02426d), 2021-12-03
Supplement: d1nj02426d1.pdf [file d1nj02426d1.pdf]

## Electronic Supplementary Information

### **Metal organic framework/chitosan/polyethylene oxide composite columnar foam as sorbent for enrichment and detection of estrogens in environmental aqueous solutions**

Huizhong Si<sup>a</sup>, Pingping He<sup>a</sup>, Xuemei Wang<sup>a</sup>, Lin Li<sup>a</sup>, Xiaohong Hou<sup>b\*</sup>

*<sup>a</sup>School of Pharmacy, Shenyang Pharmaceutical University, Shenyang Liaoning Province, P. R. China*

*<sup>b</sup>School of Pharmaceutical Engineering, Shenyang Pharmaceutical University, Shenyang Liaoning Province, P. R. China*

---

**\*Correspondence:** Professor Xiaohong Hou, School of Pharmaceutical Engineering, Shenyang Pharmaceutical University, Shenyang 110016, P. R. China

**E-mail address:** syphu\_houxiaohong@163.com

**Fax:** +86-24-43520212

## Content List

1. Chemical structures of the four analytes (Fig. S1), Page 4.
2. Analytical conditions, Page 5.
3. N<sub>2</sub> adsorption-desorption isotherms of blank CS/PEO columnar foam (Fig. S2), Page 6.
4. Effect of solution pH and ionic strength (Fig. S3), page 7.
5. Value of separation factor  $R_L$  of MIL-53(Al)/CS/PEO columnar foam towards two estrogens (Fig. S4), Page 8.
6. The plots of Langmuir and Temkin isotherm models for the adsorption of EE2 and E2 on MIL-53(Al)/CS/PEO columnar foam (Fig. S5), Page 9.
7. The van' Hoff plots of MIL-53(Al)/CS/PEO columnar foam towards two estrogens (Fig.S6), Page 10.
8. Utilization durability of MIL-53(Al)/CS/PEO columnar foam (Fig. S7), Page 11.
9. The SEM photograph of clounmar foam after cycling five times (Fig. S8), Page 12.
10. HPLC-FLD chromatograms of standard solution, spiked water sample and lake sample (Fig. S9), Page 13.
11. Calibration curves of two estrogen solutions at different pH (Table S1), Page 14.
12. Thermodynamic parameters of the adsorption of EE2 and E2 on MIL-53(Al)/CS/PEO columnar foam (Table S2), Page 15.
13. Factors and levels of orthogonal experiments (Table S3), Page 16.
14. Results analysis of the orthogonal experiments (Table S4), Page 17.
15. Linear ranges, correlation coefficients, limits of detection, limits of quantitative, precision, and repeatability for four analytes (Table S5), Page 18.

16. Uncertainty introduced by sample addition recovery, Page19.

17. Enrichment factor under different water sample, Page20.

1. Chemical structures of the four analytes

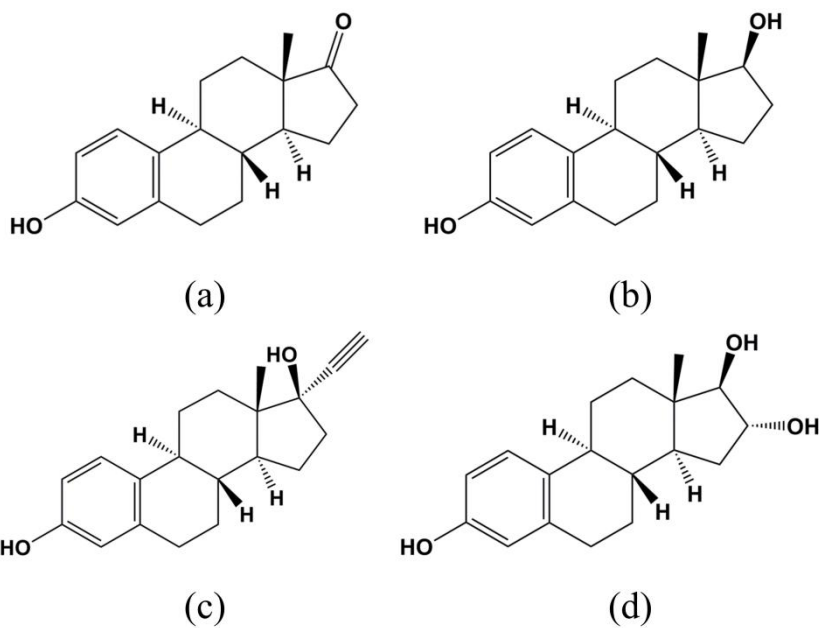

**Fig. S1.** Chemical structures of the four analytes. (A) Estradiol (E1), (B) Estradiol (E2), (C) Ethinylestradiol (EE2), (D) Estriol (E3).

## 2. *Analytical conditions*

Shimadzu LC-20 A (Shimadzu, Japan) equipped with a fluorescence detector (FLD-20 A) were employed to conduct chromatographic separation and determination of E1, E2, EE2, E3 with a Diamonsil C18 analytical column (150 mm 4.6 mm i. d., 5 mm) from Dikma (Beijing, China). The mobile phase constituted of water (A) and acetonitrile (B) was set at a flow rate of 1 mL/min throughout the run. The gradient elution conditions were as follows: 0 - 2 min, 35% - 60% B; 2 - 9 min, 60% B; 9 - 10 min, 60% - 100% B; 10-13 min, 100%-35% B. The injection volume was quantified as 20  $\mu$ L, and the column temperature was kept constant at 30

3. N<sub>2</sub> adsorption-desorption isotherms of blank CS/PEO columnar foam

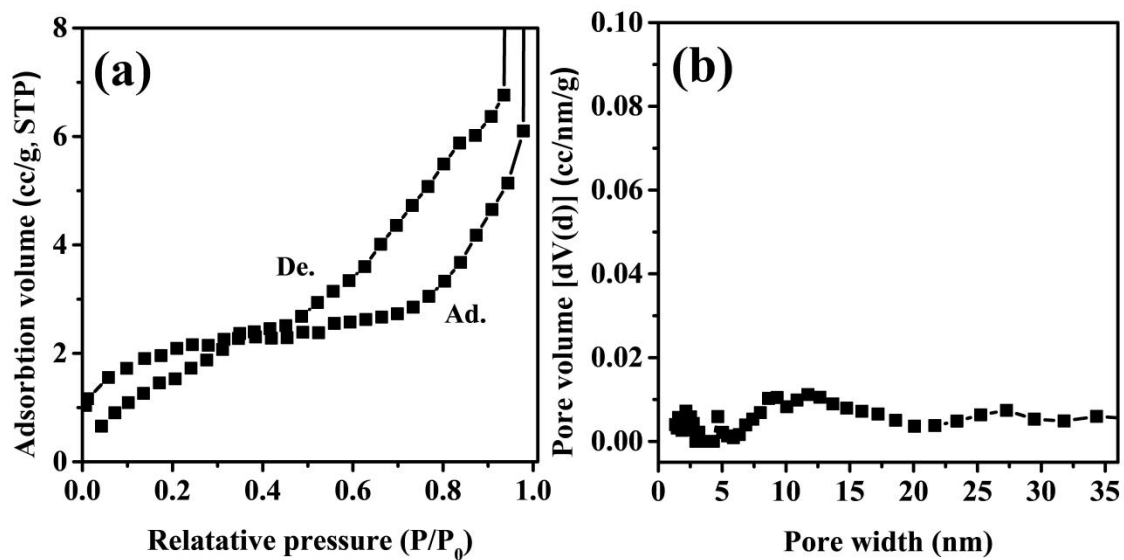

**Fig. S2.** N<sub>2</sub> adsorption-desorption isotherms of the blank CS/PEO columnar foam. The BET surface area (a), the pore size (b).

#### 4. Effect of solution pH and ionic strength

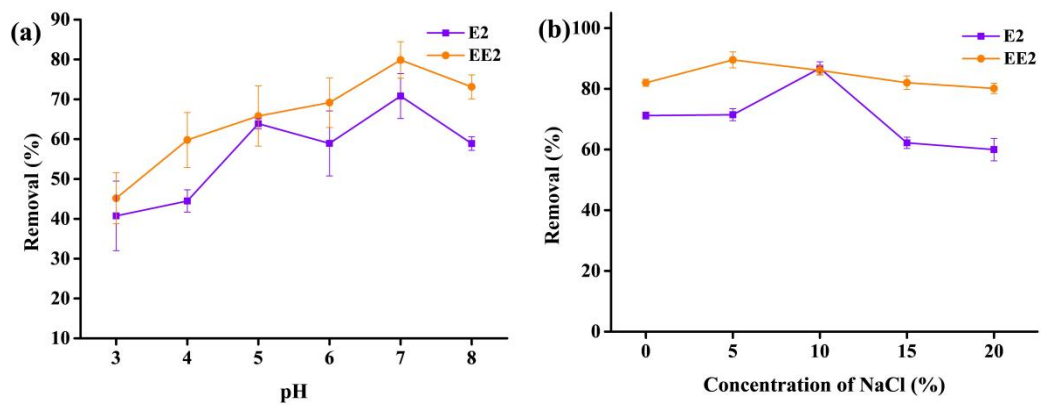

**Fig. S3.** Effect of pH (a), and ionic strength (b) on the removal of two estrogens by MIL-53(A1)/CS/PEO columnar foam.

5. Value of separation factor  $R_L$  of MIL-53(Al)/CS/PEO column foam towards two estrogens

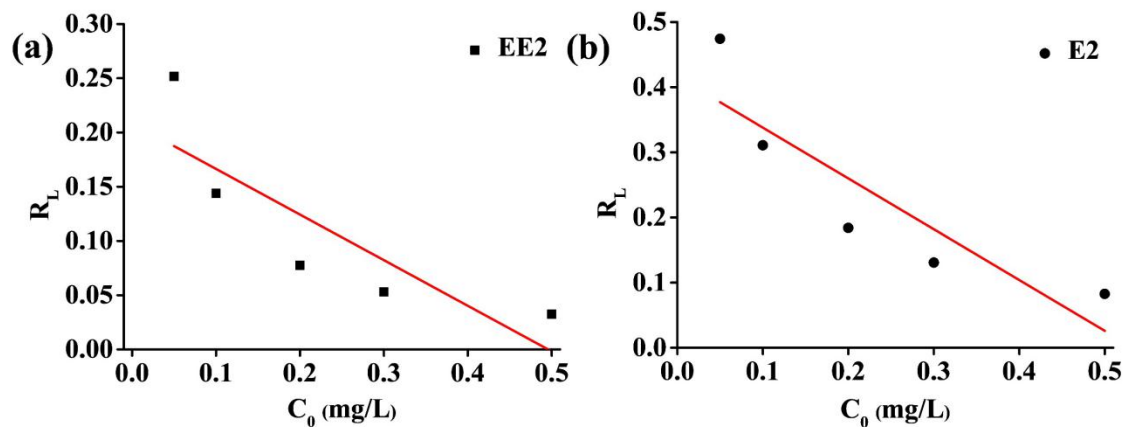

**Fig.S4.** Value of separation factor  $R_L$  of the adsorption of EE2 (a), and E2 (b) on MIL-53(Al)/CS/PEO column foam.



6. The plots of Langmuir and Temkin isotherm models for the adsorption of EE2 and E2 on MIL-53(Al)/CS/PEO columnar foam

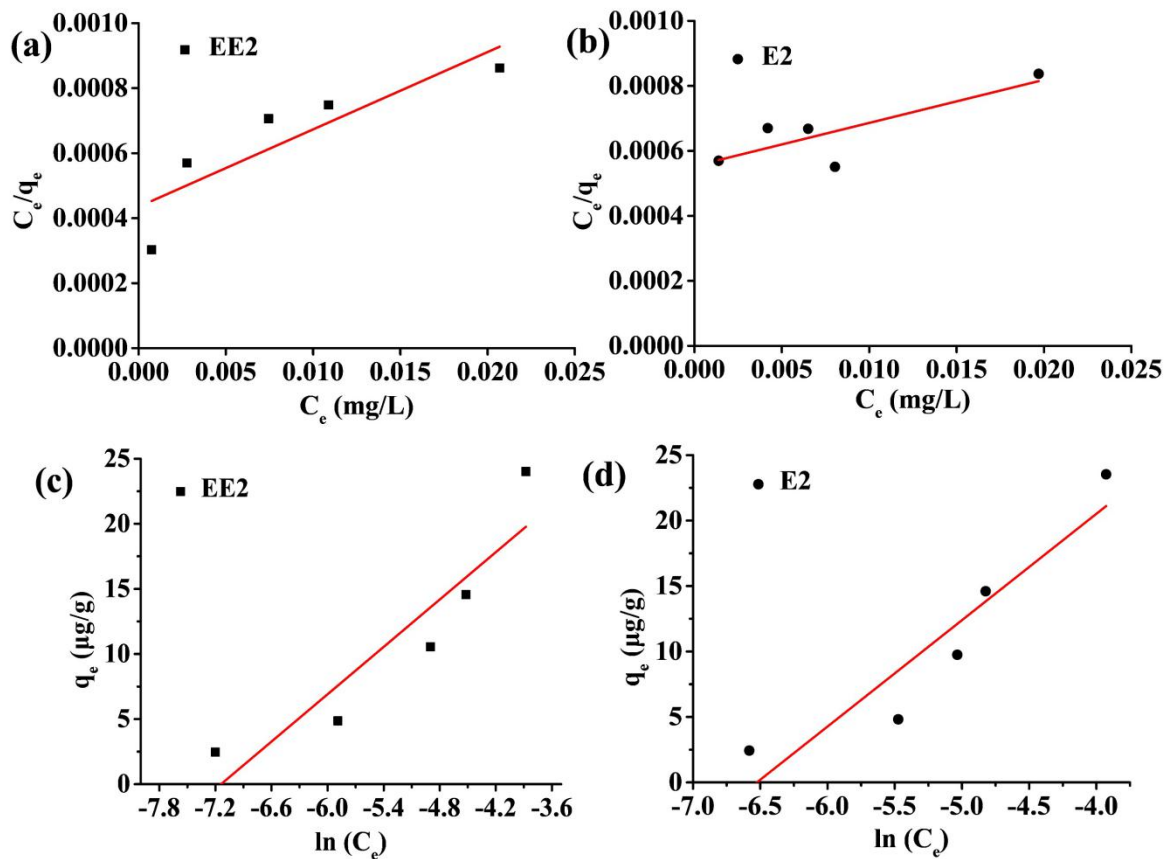

**Fig. S5.** The plots of Langmuir (a), (b) and Temkin isotherm (c), (d) models for the adsorption of EE2 and E2 on

MIL-53(Al)/CS/PEO columnar foam.

7. The van' Hoff plots of MIL-53(Al)/CS/PEO columnar foam towards two estrogens

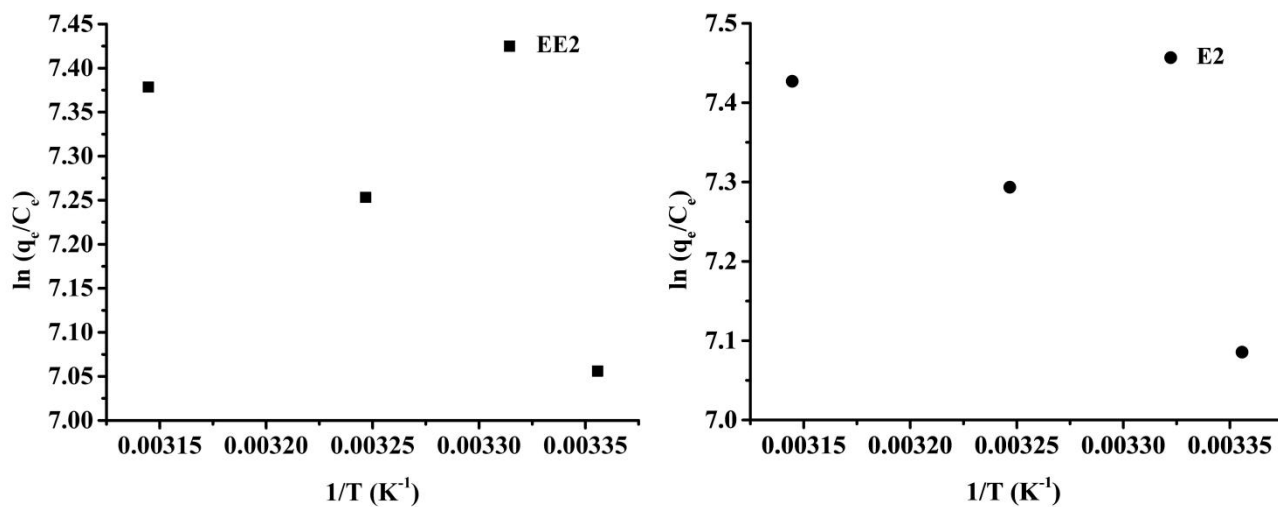

Fig.S6. The van' Hoff plots of MIL-53(Al)/CS/PEO columnar foam towards two estrogens.

## 8. Utilization durability of MIL-53(Al)/CS/PEO columnar foam

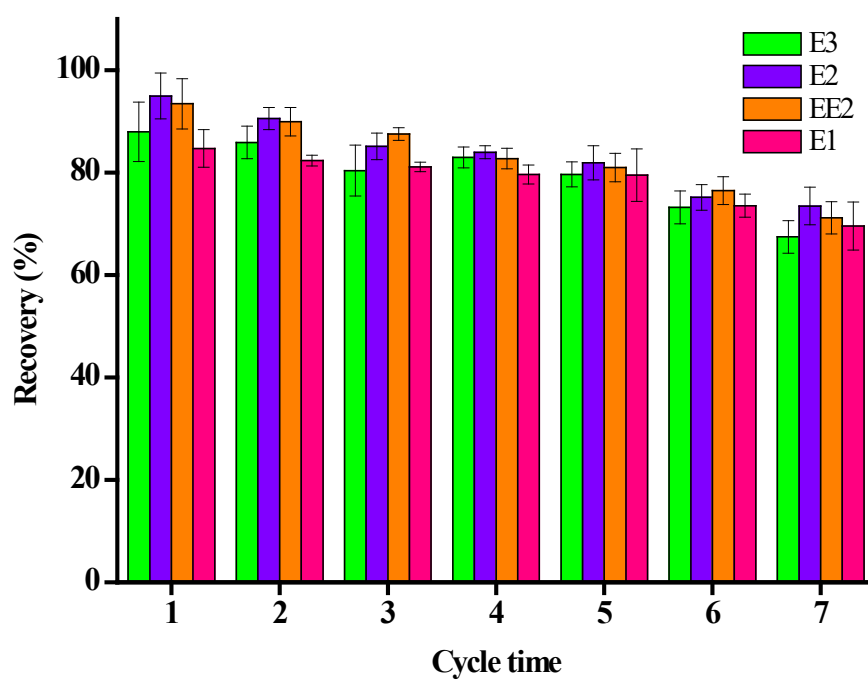

**Fig. S7.** Utilization durability of MIL-53(Al)/CS/PEO columnar foam in VA-SPE for the target analytes under the optimal conditions.

9. The SEM photograph of clounmar foam after cycling five times

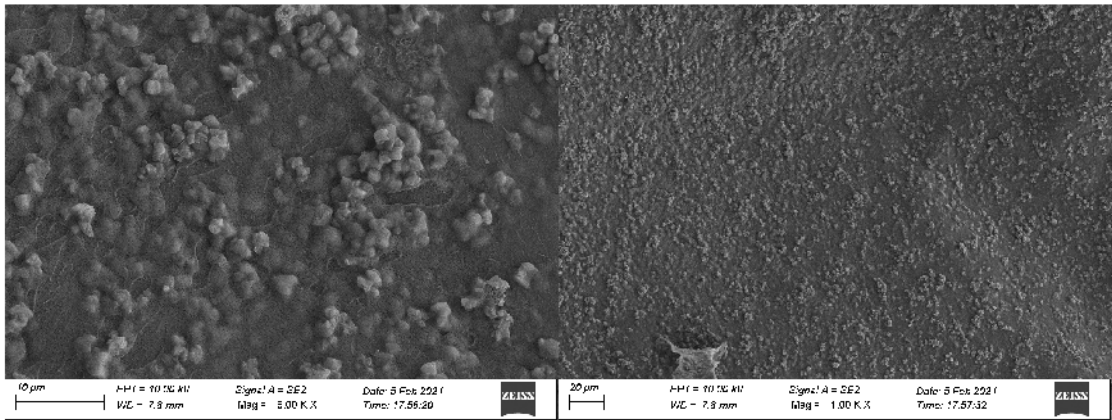

Fig. S8 The SEM photograph of clounmar foam after cycling five times

10. HPLC-FLD chromatograms of standard solution, spiked water sample and lake sample

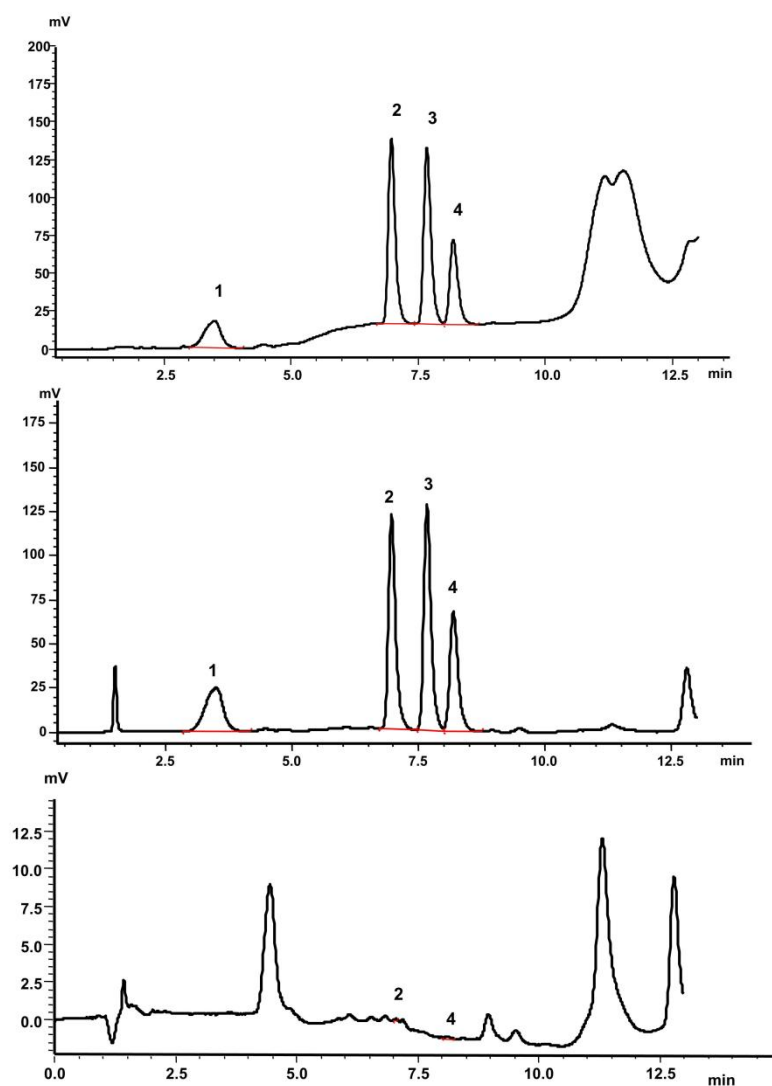

**Fig. S9.** HPLC-FLD chromatograms of standard solution, spiked water sample and lake sample. Peak identification:

(1) E3, (2) E2, (3) EE2, (4) E1.

## 11. Calibration curves of three estrogen solutions at different pH

The aqueous stock solution of E2 and EE2 (1 mg L<sup>-1</sup>) were diluted by ultrapure water to prepare five standard solutions at concentration levels of 0.25, 1.0, 5.0, 20.0, 50.0, 100.0, 200.0 µg L<sup>-1</sup>, respectively. Then, each estrogen solution was adjusted to pH value at 3, 4, 5, 6, 7, 8, and 9 with 0.1 mol L<sup>-1</sup> HCl or 0.1 mol L<sup>-1</sup> NaOH solution. The fluorescence intensities of estrogen solutions were measured using fluorospectrophotometer with the excitation and emission wavelengths of 280 nm and 310 nm, respectively. Calibration curves were constructed by the least squares linear regression analysis of the fluorescence intensity (*y*) versus the concentration (*x*).

**Table S1.** Calibration curves of EE2 and E2 at different pH.

| Analyte | pH | Linear range (µg L <sup>-1</sup> ) | Standard curve equation | <i>r</i> <sup>2</sup> |
|---------|----|------------------------------------|-------------------------|-----------------------|
| EE2     | 3  | 0.25-200                           | $y = 111.09x - 49.44$   | 0.9998                |
|         | 4  | 0.25-200                           | $y = 112.21x + 101.6$   | 0.9999                |
|         | 5  | 0.25-200                           | $y = 113.98x + 59.818$  | 0.9994                |
|         | 6  | 0.25-200                           | $y = 112.33x + 55.002$  | 0.9997                |
|         | 7  | 0.25-200                           | $y = 112.17x + 90.372$  | 0.9998                |
|         | 8  | 0.25-200                           | $y = 111.75x + 109.39$  | 0.9999                |
| E2      | 3  | 0.25-200                           | $y = 108.49x - 41.054$  | 0.9993                |
|         | 4  | 0.25-200                           | $y = 110.64x - 17.328$  | 0.9995                |
|         | 5  | 0.25-200                           | $y = 108.62x + 8.9442$  | 0.9999                |
|         | 6  | 0.25-200                           | $y = 109.08x + 34.55$   | 1                     |
|         | 7  | 0.25-200                           | $y = 108.74x + 30.452$  | 0.9998                |
|         | 8  | 0.25-200                           | $y = 109.32x - 4.7402$  | 0.9999                |

12. Thermodynamic parameters of the adsorption of EE2 and E2 on MIL-53(Al)/CS/PEO columnar foam

**Table S2.** Thermodynamic parameters of E2 and EE2 adsorption onto MIL-53(Al)/CS/PEO columnar foam.

| Analyte | $T$ (K) | $\Delta G$ (kJ mol <sup>-1</sup> ) | $\Delta H$ (kJ mol <sup>-1</sup> ) | $\Delta S$ (J mol <sup>-1</sup> K <sup>-1</sup> ) |
|---------|---------|------------------------------------|------------------------------------|---------------------------------------------------|
| EE2     | 298     | -17.48                             | 12.71                              | 101.40                                            |
|         | 308     | -18.57                             |                                    |                                                   |
|         | 318     | -19.51                             |                                    |                                                   |
| E2      | 298     | -17.55                             | 13.48                              | 104.22                                            |
|         | 308     | -18.68                             |                                    |                                                   |
|         | 318     | -19.64                             |                                    |                                                   |

### 13. Factors and levels of orthogonal experiments

**Table S3.** Factors and levels of the orthogonal experiments

| Levels | Factors * |     |     |    |
|--------|-----------|-----|-----|----|
|        | A         | B   | C   | D  |
| 1      | 20        | 75  | 4:1 | 40 |
| 2      | 30        | 100 | 3:1 | 60 |
| 3      | 40        | 125 | 2:1 | 80 |

\*A, the amount of MOFs (mg);

B, glutaraldehyde dosage ( $\mu\text{L}$ );

C, the proportions of CS/PEO (w/w);

D, acetic acid glacial dosage ( $\mu\text{L}$ )



#### 14. Results analysis of the orthogonal experiments

**Table S4.** Result analysis of the orthogonal experiments

| No. | Factors* |        |        |        | Recovery (%) |
|-----|----------|--------|--------|--------|--------------|
|     | A        | B      | C      | D      |              |
| 1   | 1        | 1      | 1      | 1      | 51.51        |
| 2   | 1        | 2      | 2      | 2      | 69.22        |
| 3   | 1        | 3      | 3      | 3      | 50.46        |
| 4   | 2        | 1      | 2      | 3      | 80.25        |
| 5   | 2        | 2      | 3      | 1      | 75.76        |
| 6   | 2        | 3      | 1      | 2      | 67.53        |
| 7   | 3        | 1      | 3      | 2      | 74.09        |
| 8   | 3        | 2      | 1      | 3      | 67.60        |
| 9   | 3        | 3      | 2      | 1      | 69.04        |
| K1  | 171.19   | 205.85 | 186.64 | 196.31 |              |
| K2  | 223.54   | 212.58 | 218.51 | 210.84 |              |
| K3  | 210.73   | 187.03 | 200.31 | 198.31 |              |
| k1  | 57.06    | 68.62  | 62.21  | 65.44  |              |
| k2  | 74.51    | 70.86  | 72.84  | 70.28  |              |
| k3  | 70.24    | 62.34  | 66.77  | 66.10  |              |
| R   | 17.45    | 8.52   | 10.62  | 4.84   |              |

\*A, the amount of MOFs (mg);

B, glutaraldehyde dosage ( $\mu\text{L}$ );

C, the proportions of CS/PEO (w/w);

D, acetic acid glacial dosage ( $\mu\text{L}$ )

15. Linear ranges, correlation coefficients, limits of detection, limits of quantitative, precision, and repeatability for four analytes

**Table S5.** Linear ranges, correlation coefficients, limits of detection, limits of quantitative, precision, and repeatability for four analytes.

| Analyte | Interday precision |                     |                   | Intraday precision |                     |                   | Repeatability<br>(RSD%, $n = 6$ ) |
|---------|--------------------|---------------------|-------------------|--------------------|---------------------|-------------------|-----------------------------------|
|         | (RSD%, $n = 9$ )   |                     |                   | (RSD%, $n = 18$ )  |                     |                   |                                   |
|         | Low <sup>a</sup>   | Middle <sup>b</sup> | High <sup>c</sup> | Low <sup>a</sup>   | Middle <sup>b</sup> | High <sup>c</sup> |                                   |
| E3      | 3.2                | 4.4                 | 6.5               | 6.0                | 5.0                 | 3.6               | 4.8                               |
| E2      | 4.0                | 2.7                 | 2.9               | 11.3               | 4.2                 | 3.5               | 4.0                               |
| EE2     | 5.3                | 3.3                 | 2.6               | 7.0                | 1.6                 | 2.1               | 3.0                               |
| E1      | 4.5                | 3.6                 | 3.8               | 9.1                | 6.2                 | 5.1               | 5.3                               |

a: 0.04 ng mL<sup>-1</sup> for E3, E2 and EE2, 0.4 ng mL<sup>-1</sup> for E1

b: 0.5 ng mL<sup>-1</sup> for E3, E2 and EE2, 5 ng mL<sup>-1</sup> for E1

c: 3.0 ng mL<sup>-1</sup> for E3, E2 and EE2, 30 ng mL<sup>-1</sup> for E1

16. Uncertainty introduced by sample addition recovery

**Table S6.** Uncertainty introduced by sample addition recovery

| Water<br>sample | Recovery (RSD)% |         |         |         |         | Average<br>(%) | S(R) | u(R) |
|-----------------|-----------------|---------|---------|---------|---------|----------------|------|------|
|                 | Sample1         | Sample2 | Sample3 | Sample4 | Sample5 |                |      |      |
| E3              | 104.8           | 100.9   | 104.6   | 104.2   | 110.7   | 105.0          | 3.5  | 1.6  |
| E2              | 110.7           | 100.4   | 105.5   | 104.6   | 97.1    | 103.7          | 5.2  | 2.3  |
| EE2             | 83.5            | 95.5    | 86.7    | 90.2    | 101.1   | 91.4           | 7.0  | 3.1  |
| E1              | 93.3            | 96.3    | 99.0    | 94.6    | 101.7   | 97.0           | 3.4  | 1.5  |

17. Enrichment factor under different water sample

**Table S7.** Enrichment factors of estrogen in different water samples

| Water sample | Enrichment factor |       |       |       |
|--------------|-------------------|-------|-------|-------|
|              | E3                | E2    | EE2   | E1    |
| Sample1      | 104.8             | 110.7 | 83.5  | 93.3  |
| Sample2      | 100.9             | 100.4 | 95.5  | 96.3  |
| Sample3      | 104.6             | 105.5 | 86.7  | 99.0  |
| Sample4      | 104.2             | 104.6 | 90.2  | 94.6  |
| Sample5      | 110.7             | 97.1  | 101.1 | 101.7 |
